# Supplementary material for: Strong Inhibitory Activity and Action Modes of Synthetic Maslinic Acid Derivative on Highly Pathogenic Coronaviruses: COVID-19 Drug Candidate
Source: MDPI journal article supplement (doi:10.3390/pathogens10050623), 2021-05-19

## **Supplementary Data**

### **A) NMR Spectra of isolated and synthesized compounds**

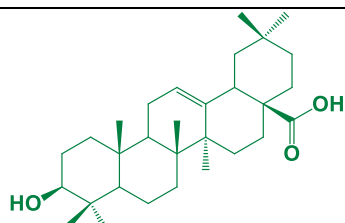

Compound 1

$^1\text{H}$  NMR

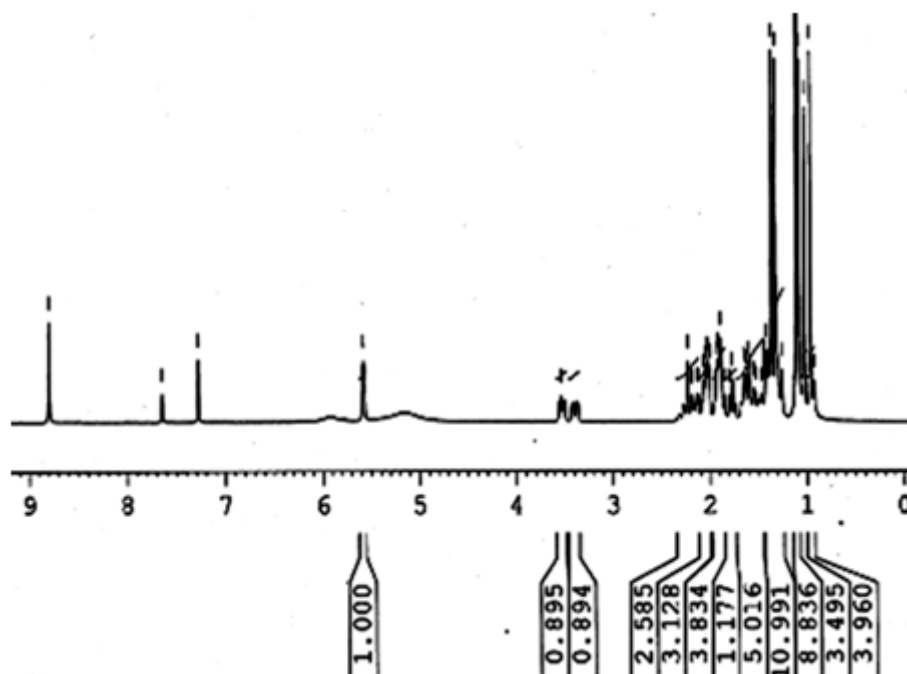

$^{13}\text{C}$  NMR

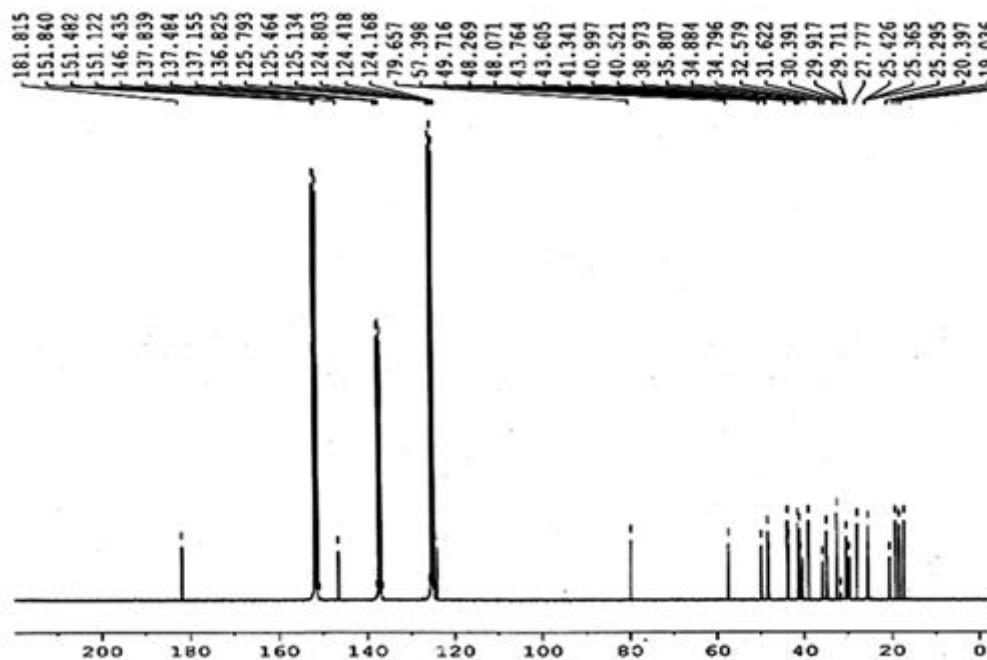

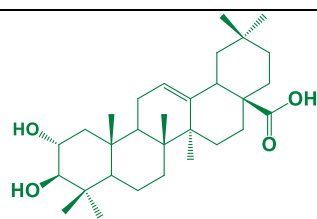

Compound 2

$^1\text{H}$  NMR

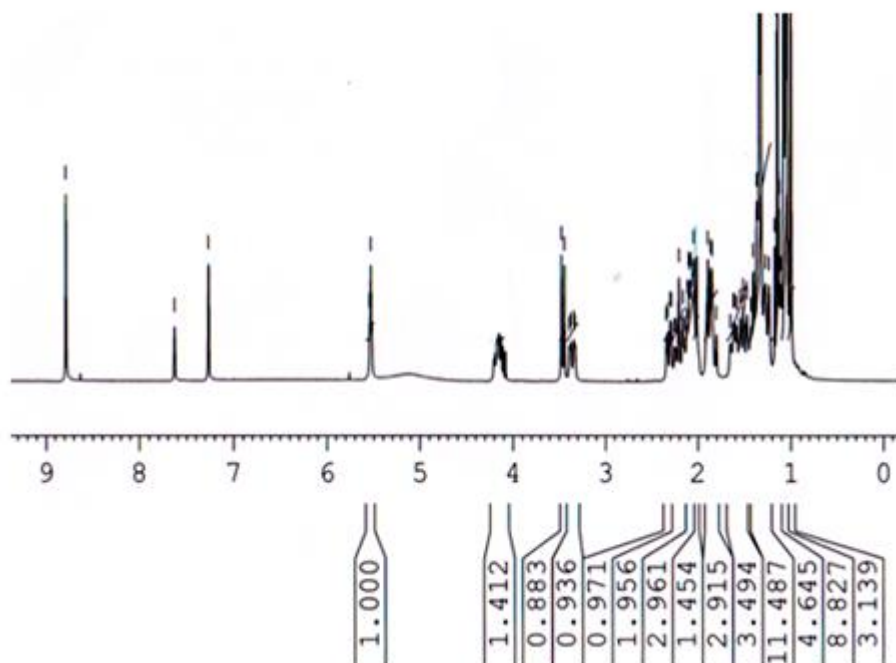

$^{13}\text{C}$  NMR

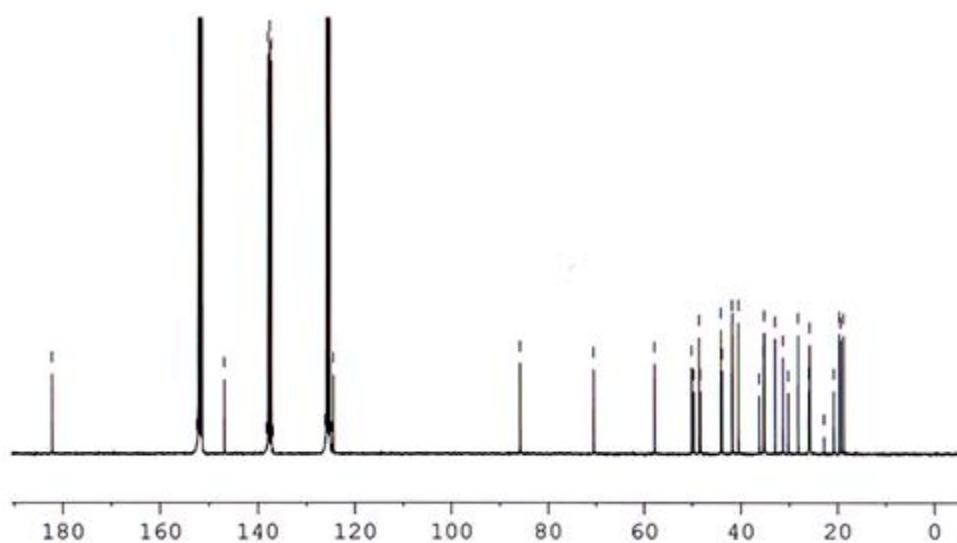

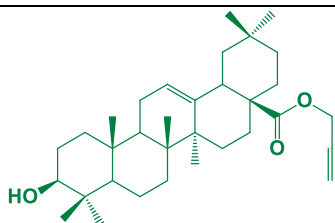

Compound 3

$^1\text{H}$  NMR

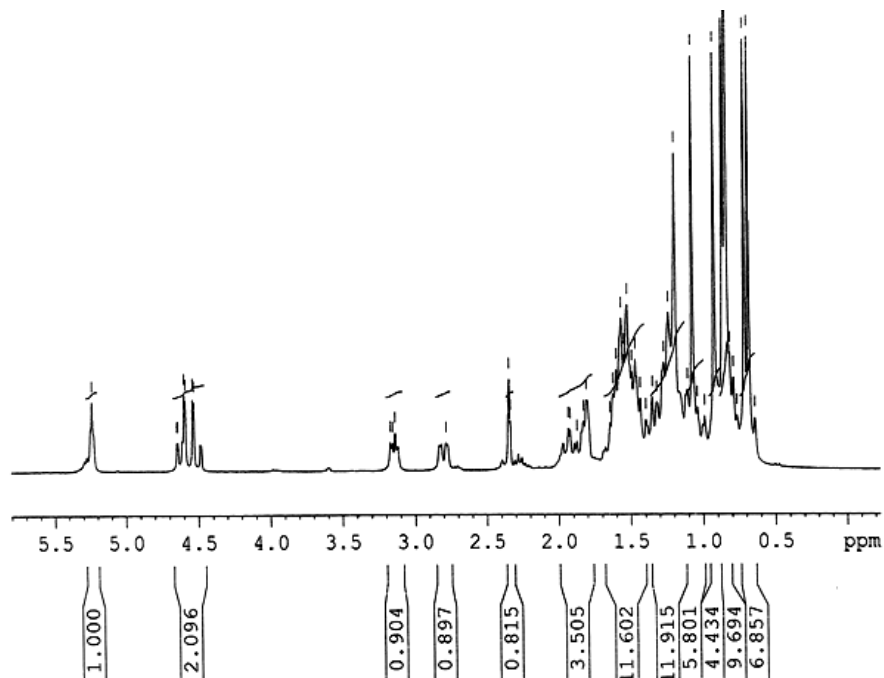

$^{13}\text{C}$  NMR

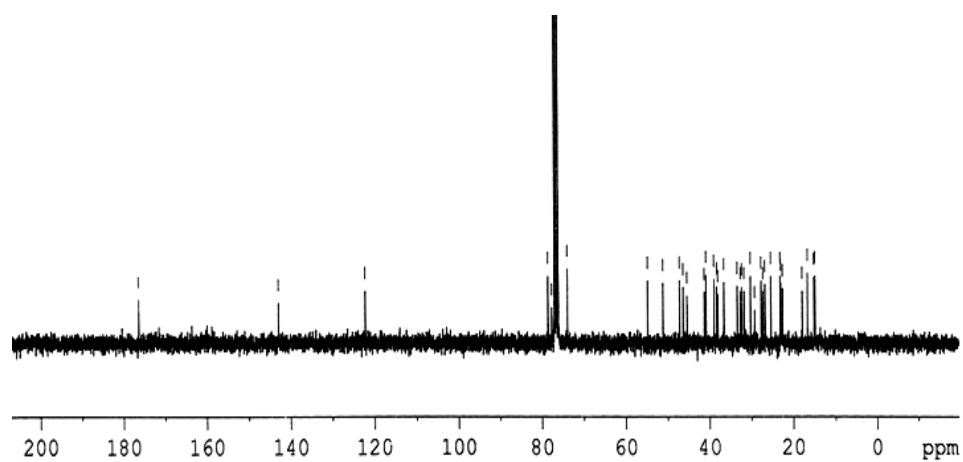

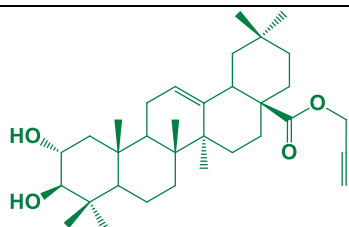

Compound 4

$^1\text{H}$  NMR

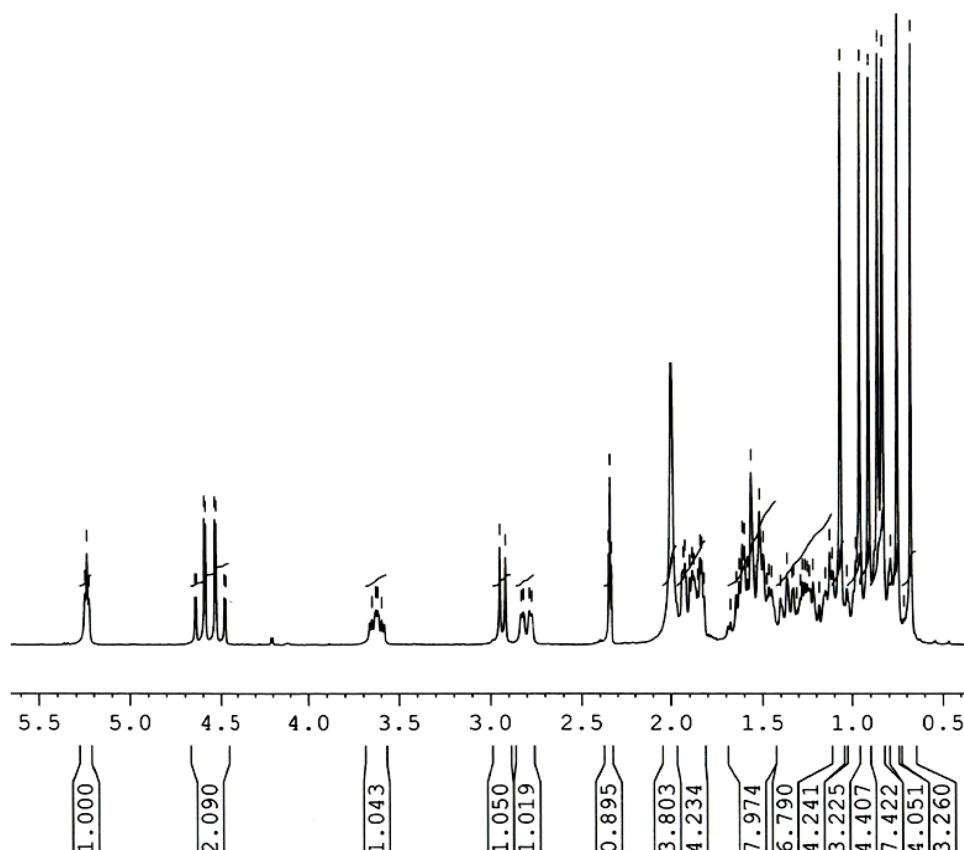

$^{13}\text{C}$  NMR

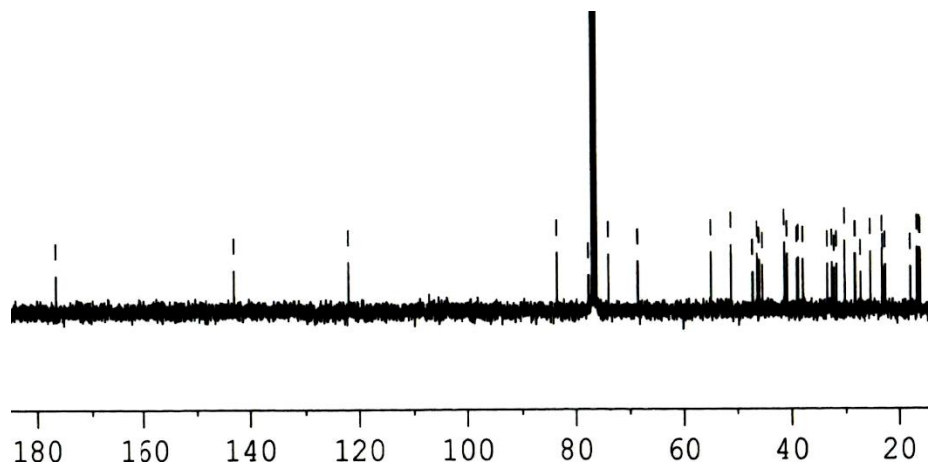

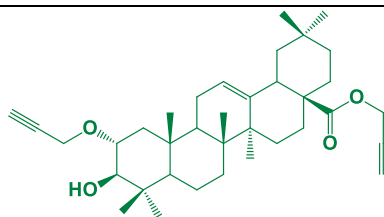

Compound **5**

$^1\text{H}$  NMR

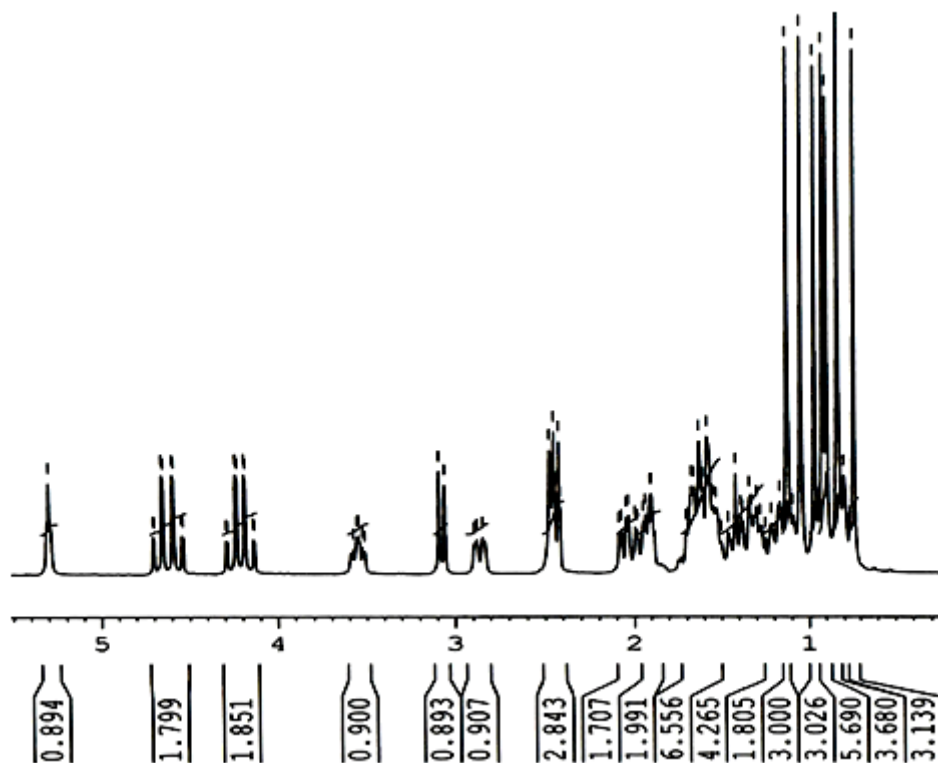

$^{13}\text{C}$  NMR

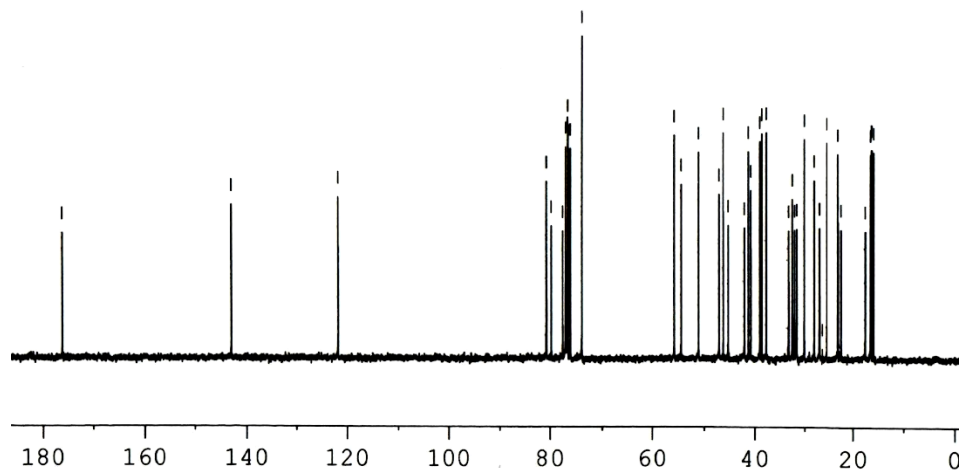

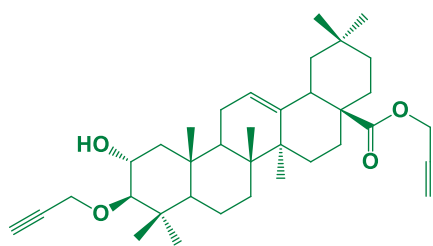

Compound 6

$^1\text{H}$  NMR

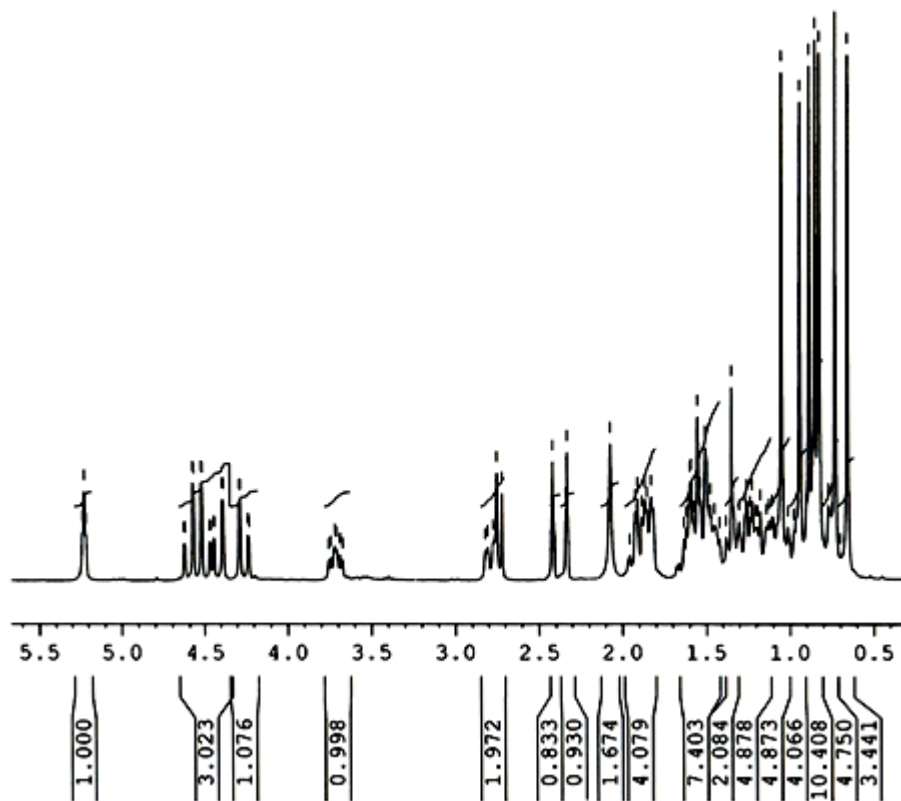

$^{13}\text{C}$  NMR

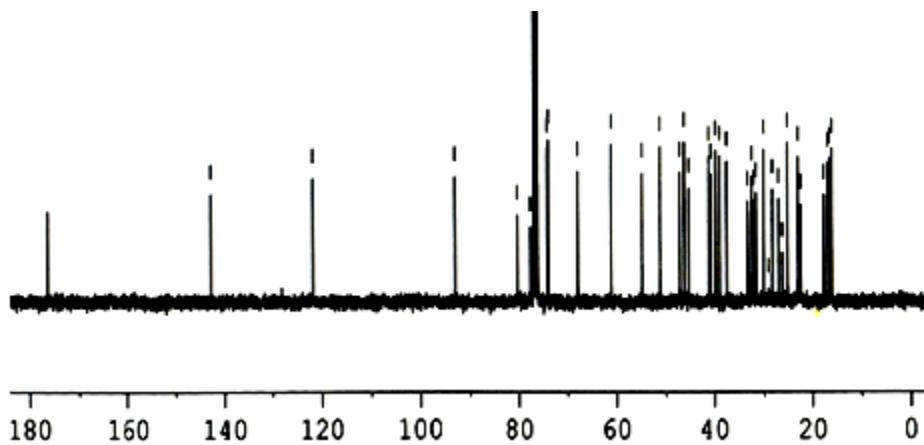

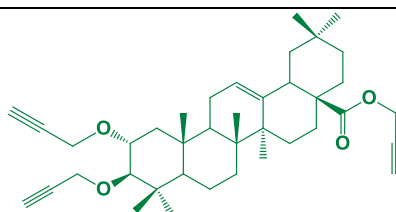

Compound 7

$^1\text{H}$  NMR

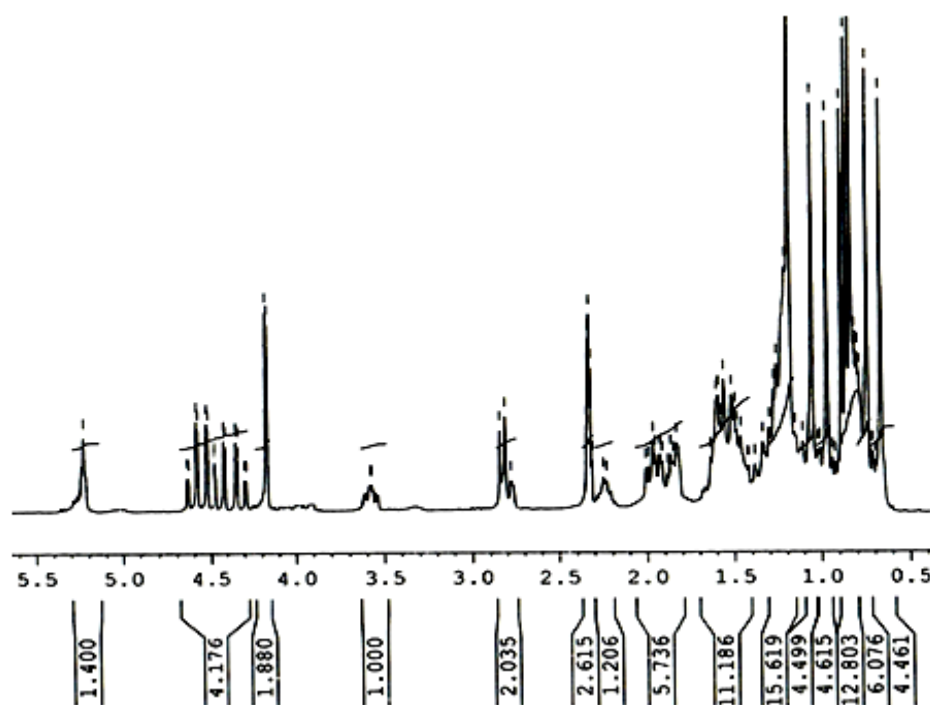

$^{13}\text{C}$  NMR

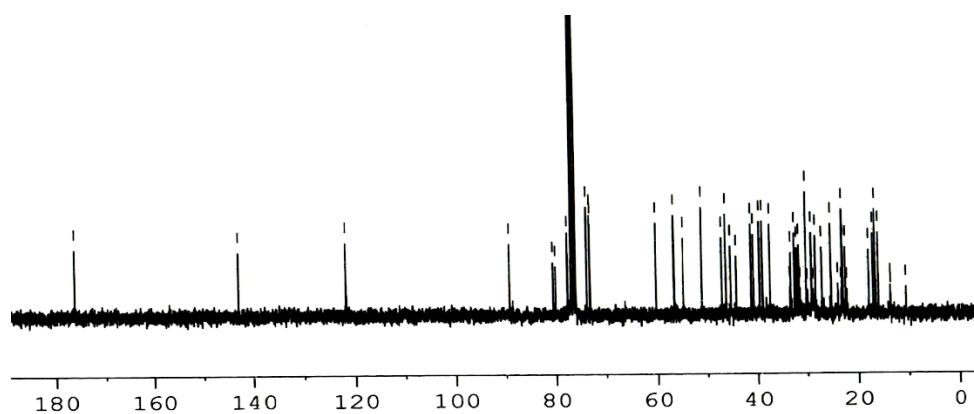



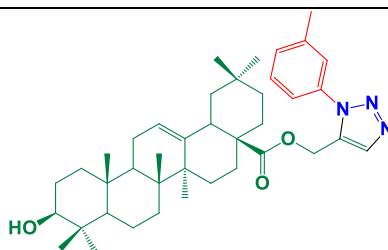

Compound 8

$^1\text{H}$  NMR

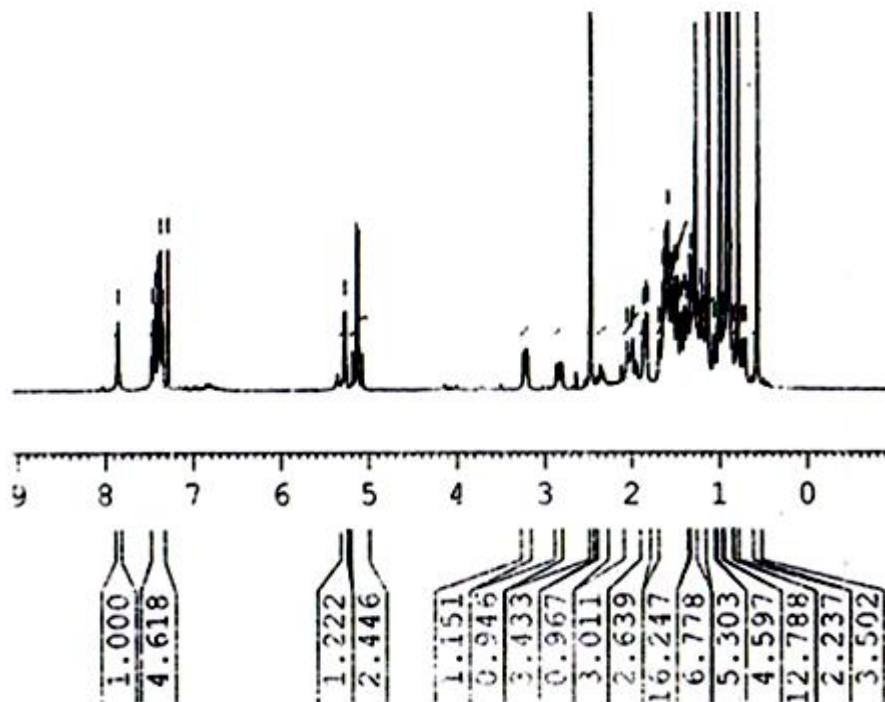

$^{13}\text{C}$  NMR

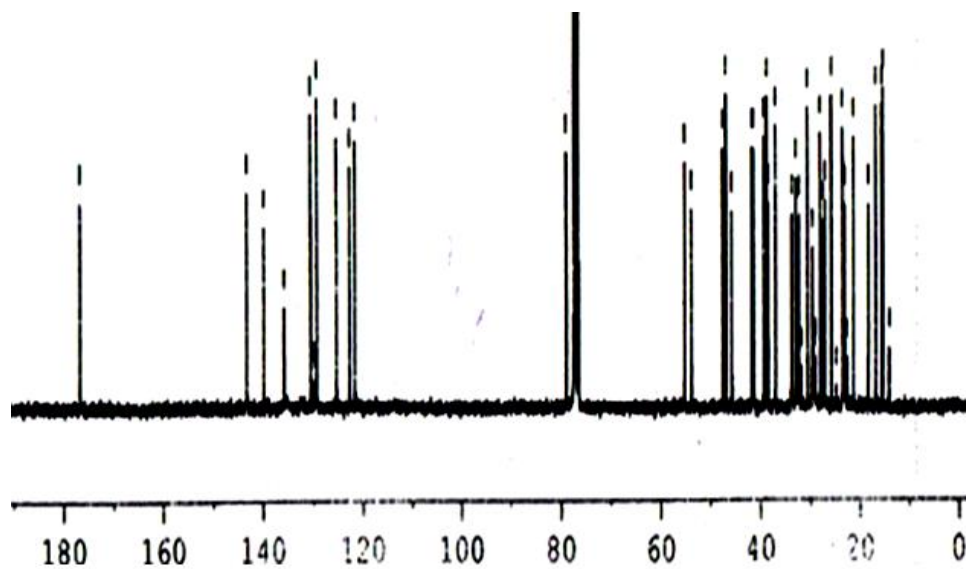

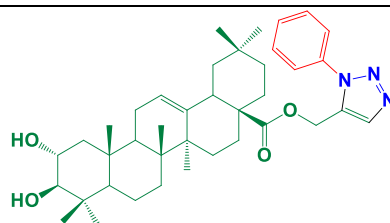

Compound 9

$^1\text{H}$  NMR

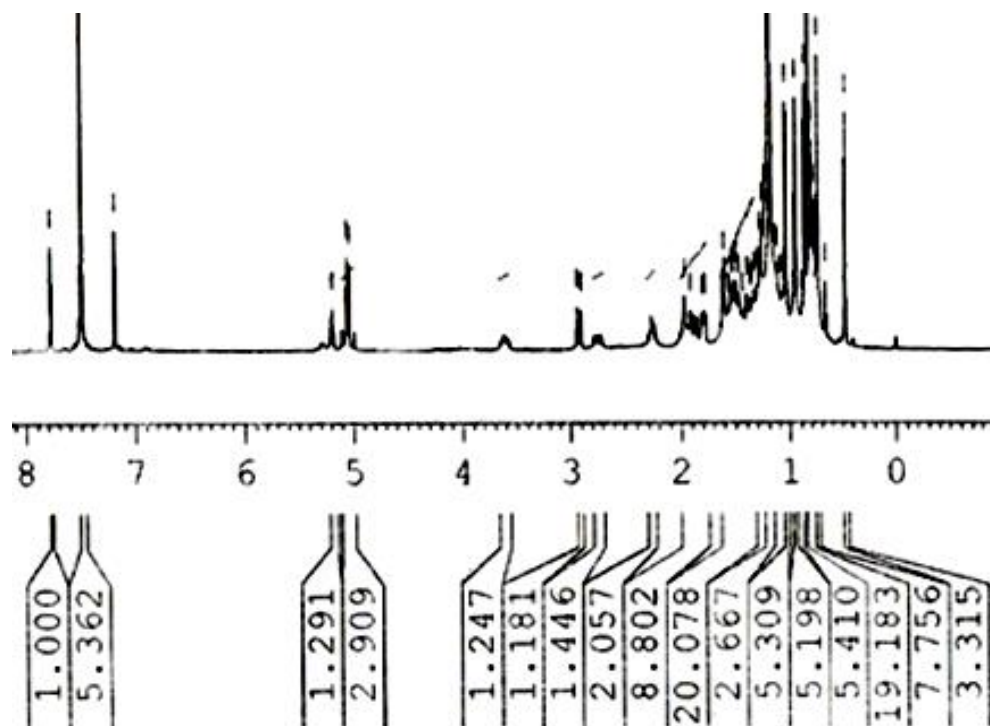

$^{13}\text{C}$  NMR

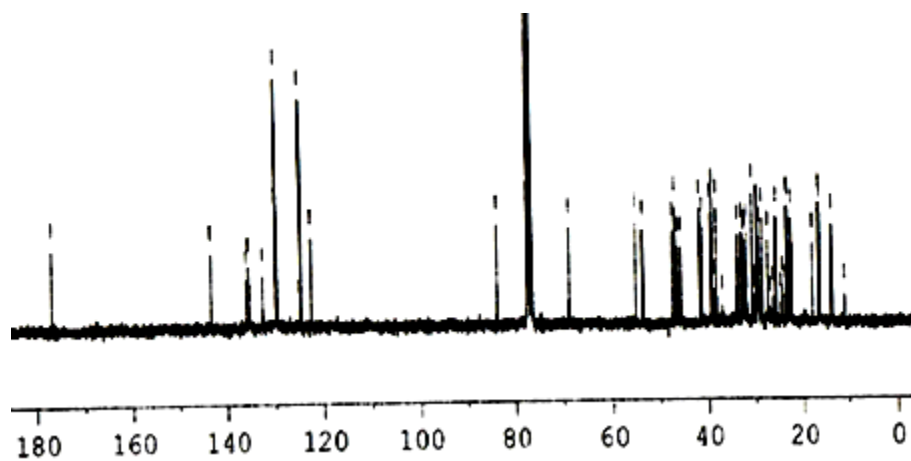

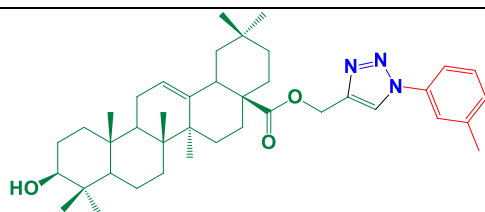

Compound 10

$^1\text{H}$  NMR

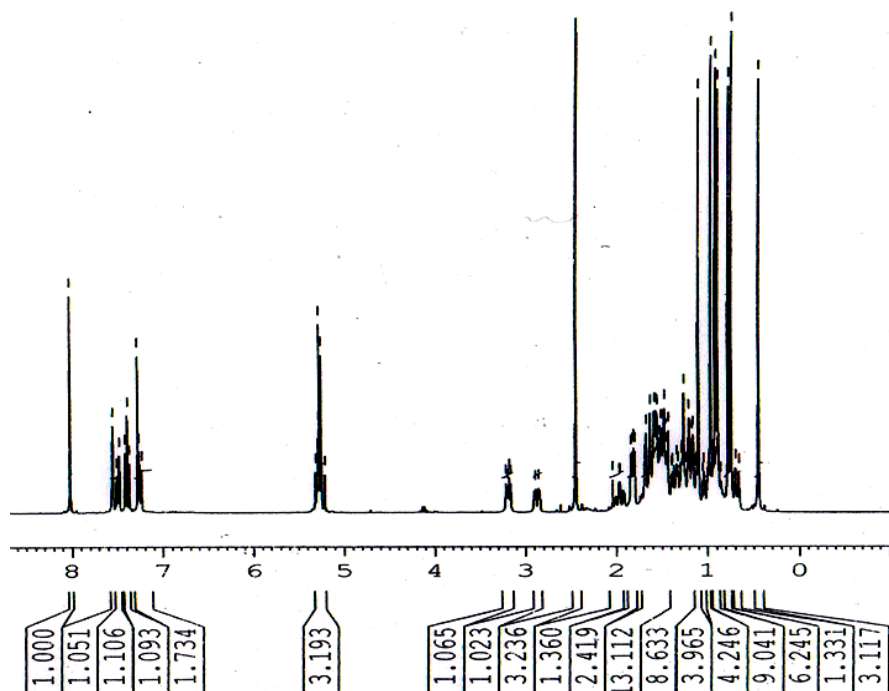

$^{13}\text{C}$  NMR

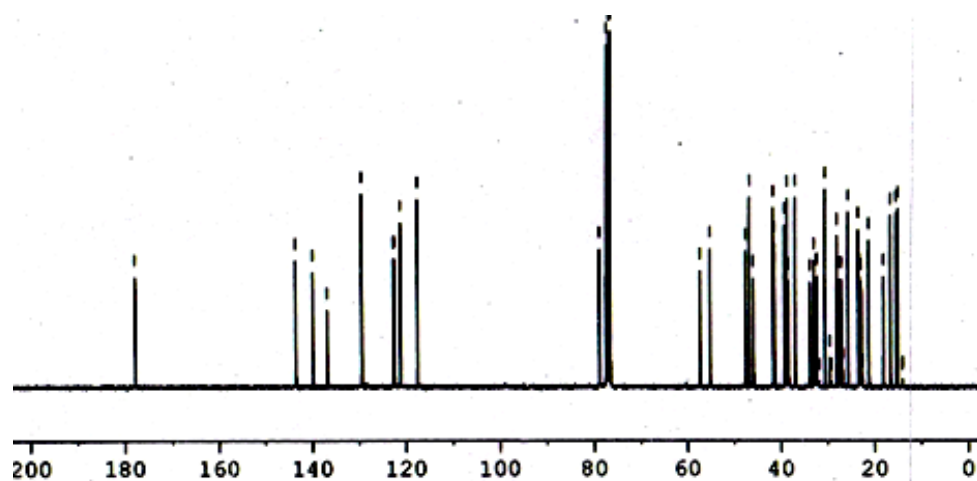

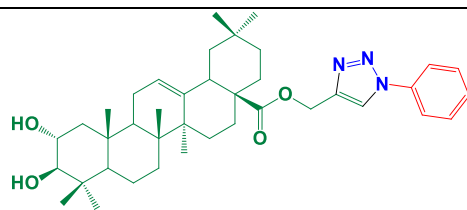

Compound 11

$^1\text{H}$  NMR

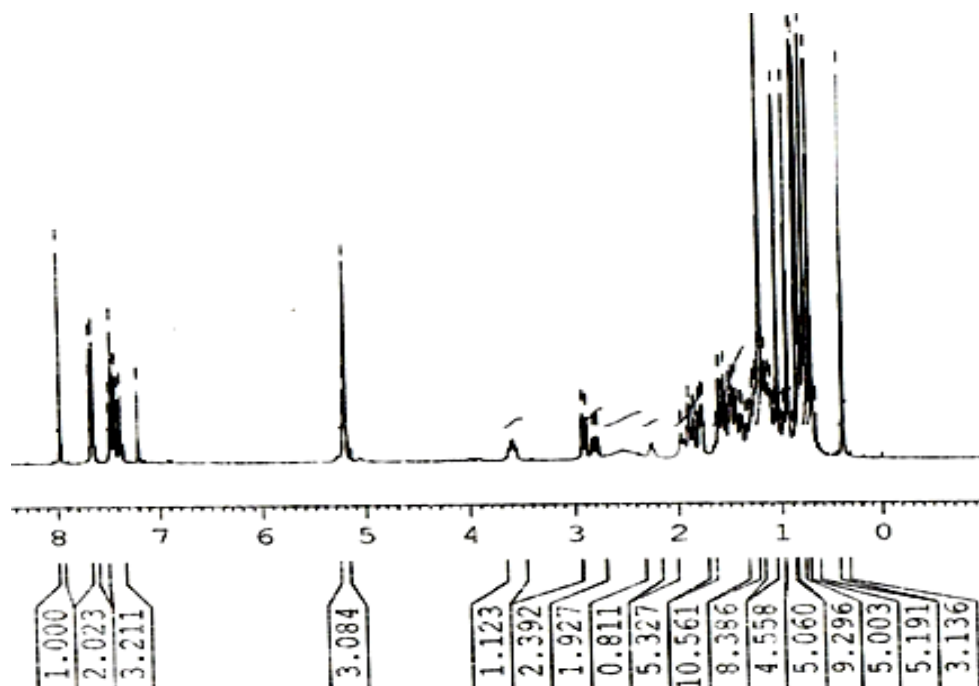

$^{13}\text{C}$  NMR

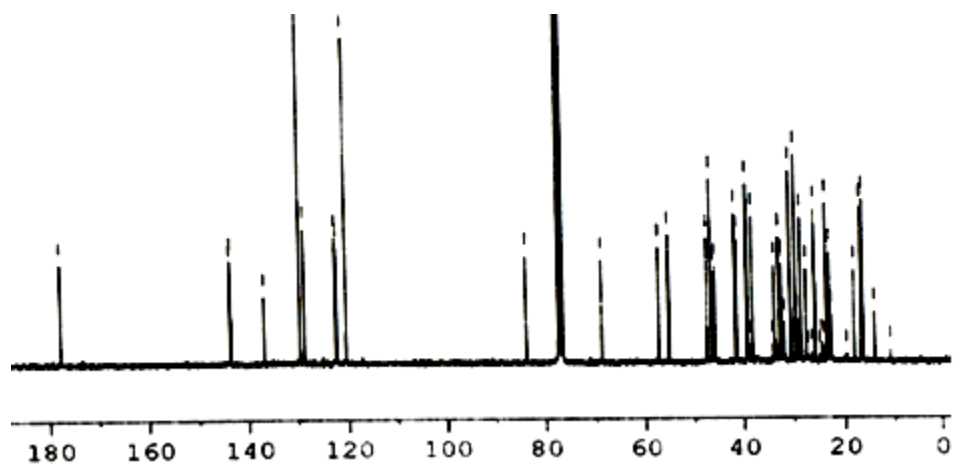

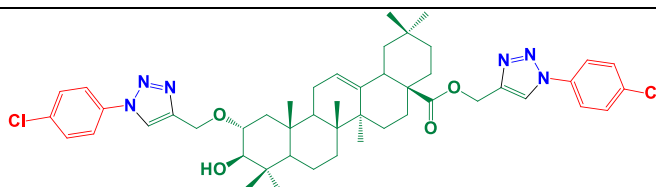

Compound 12

$^1\text{H}$  NMR

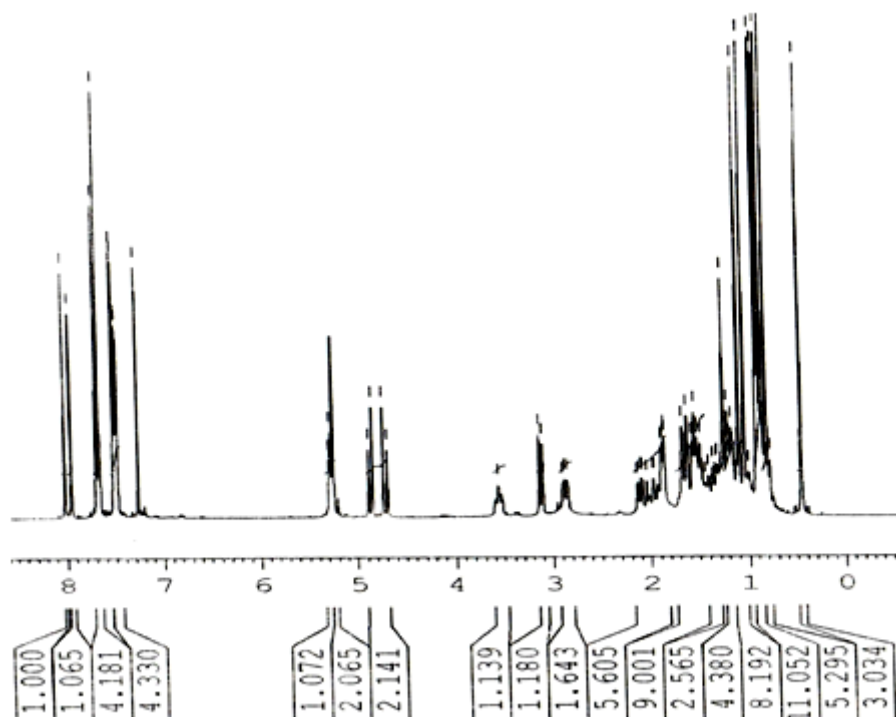

$^{13}\text{C}$  NMR

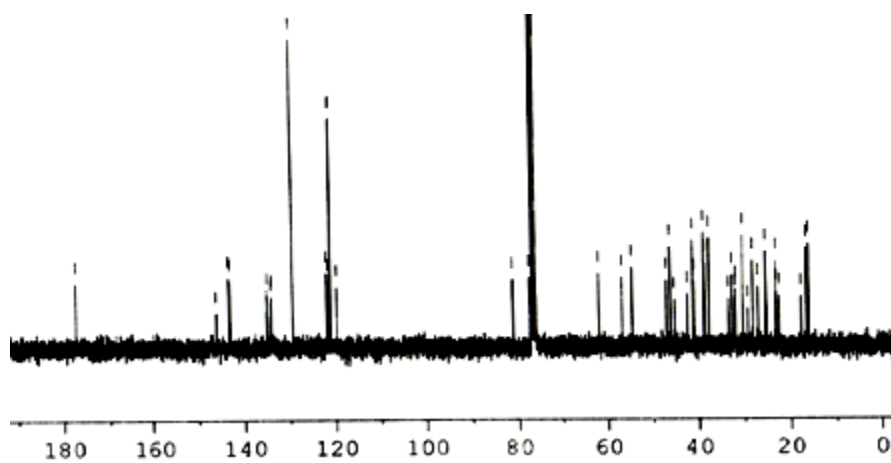

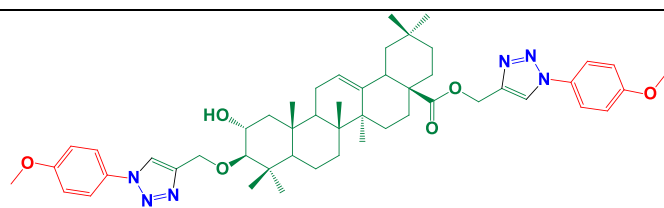

Compound **13**

$^1\text{H}$  NMR

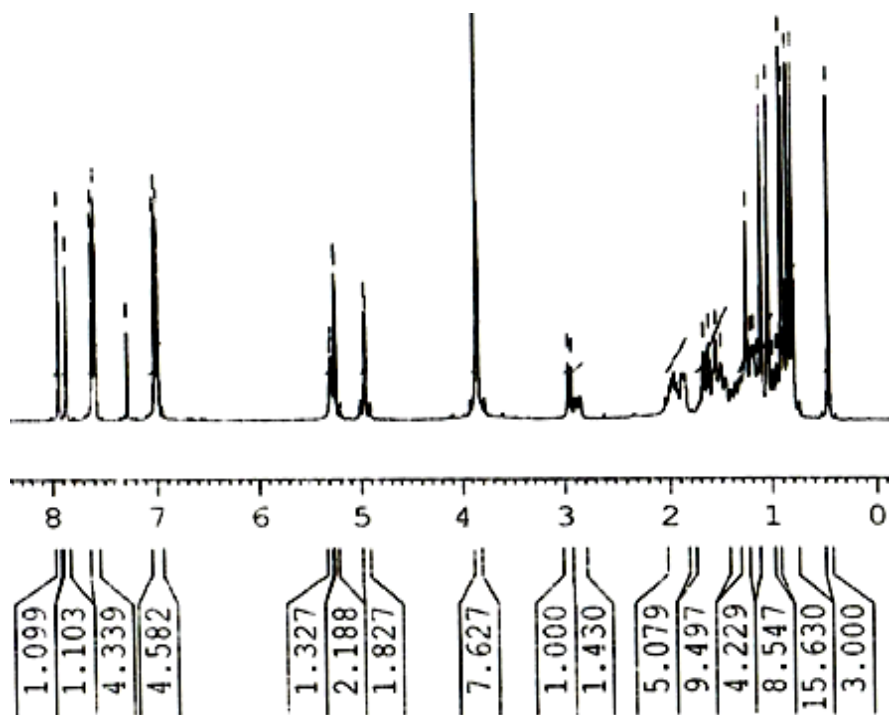

$^{13}\text{C}$  NMR

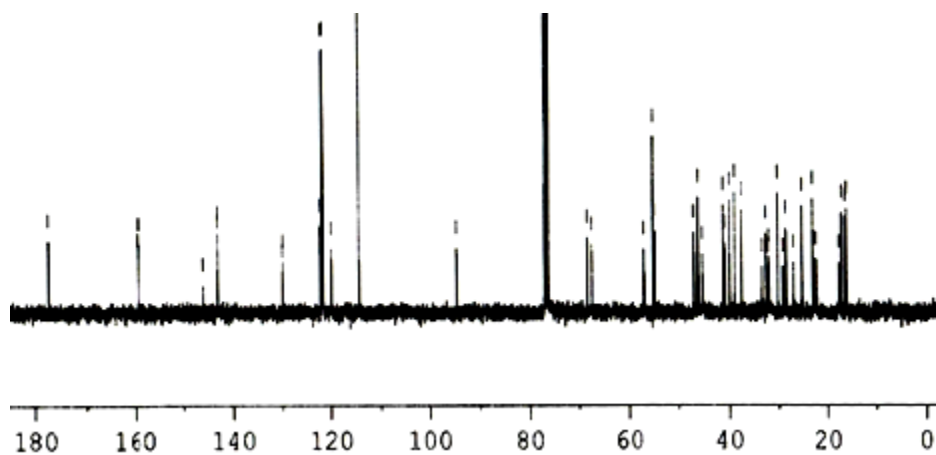

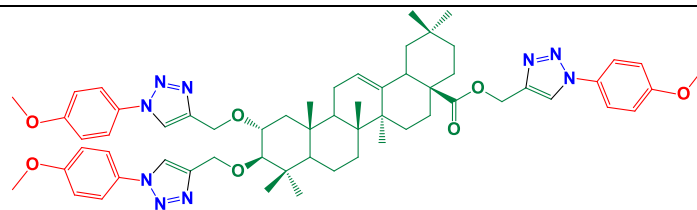

Compound 14

$^1\text{H}$  NMR

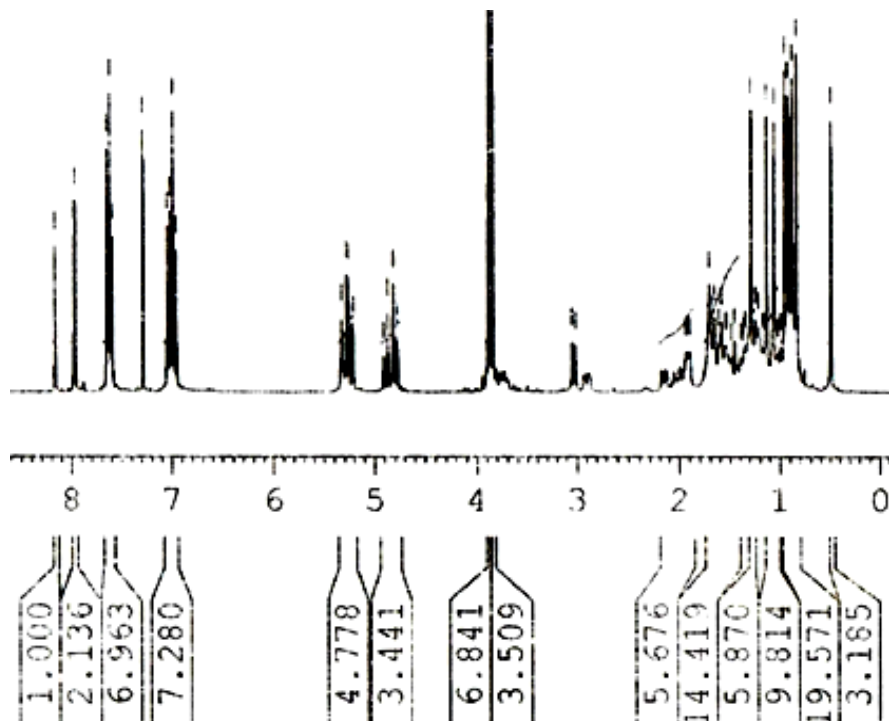

$^{13}\text{C}$  NMR

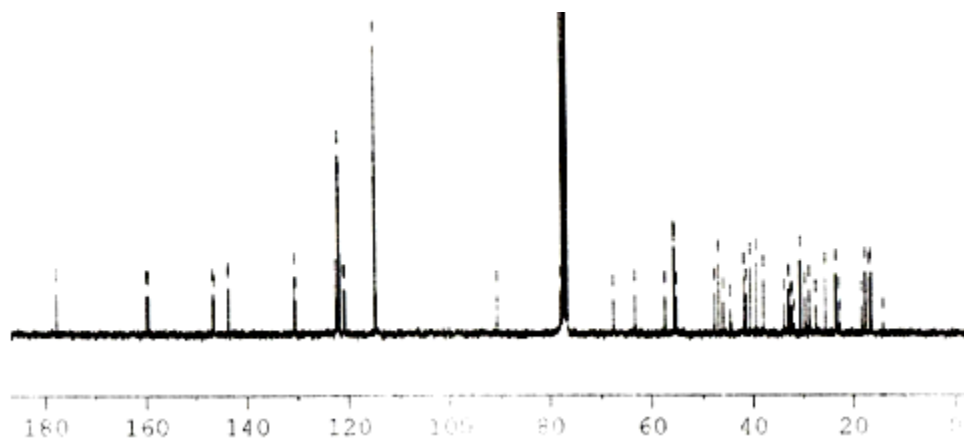

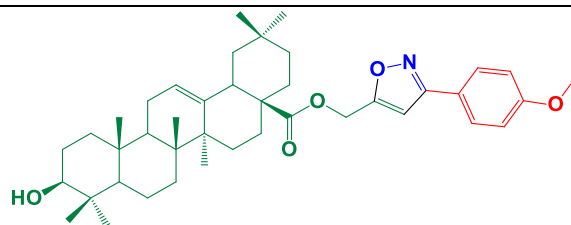

Compound **15**

$^1\text{H}$  NMR

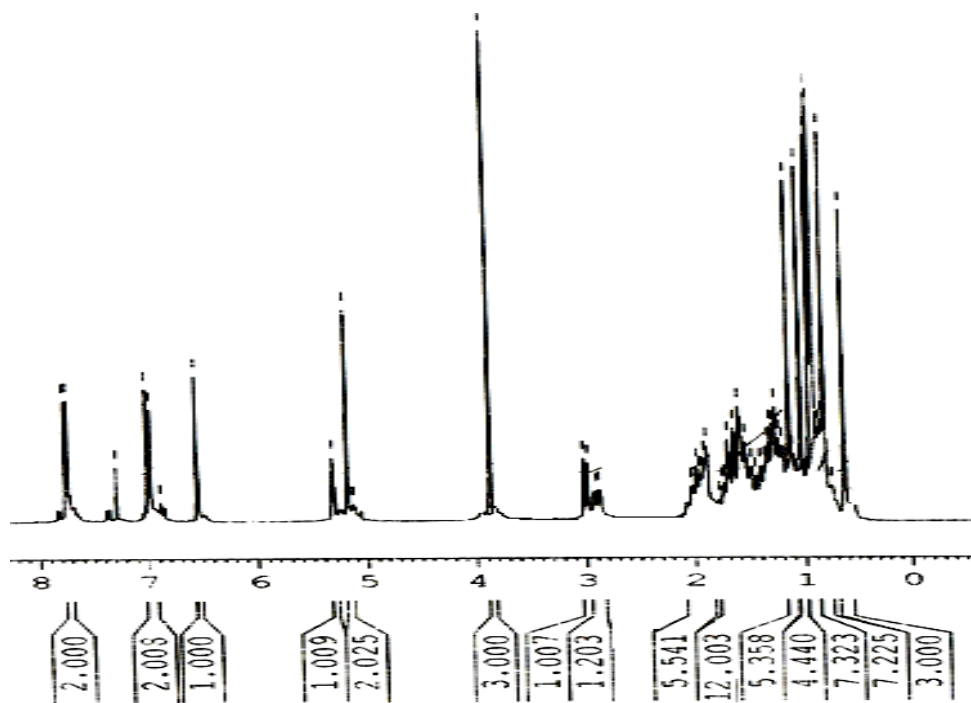

$^{13}\text{C}$  NMR

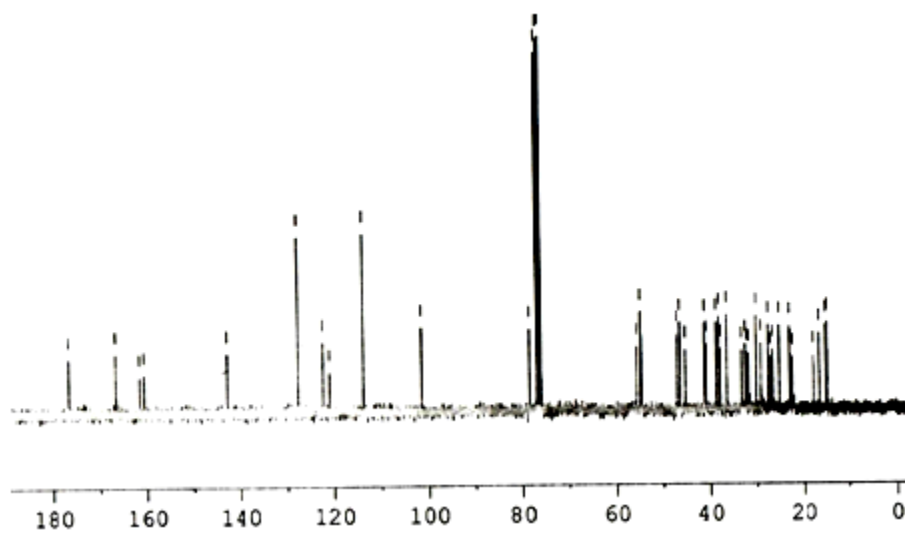



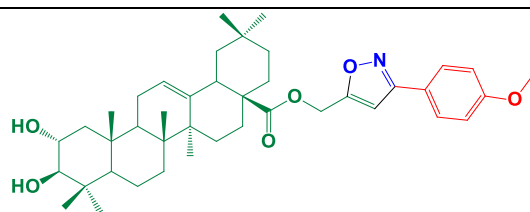

Compound 16

$^1\text{H}$  NMR

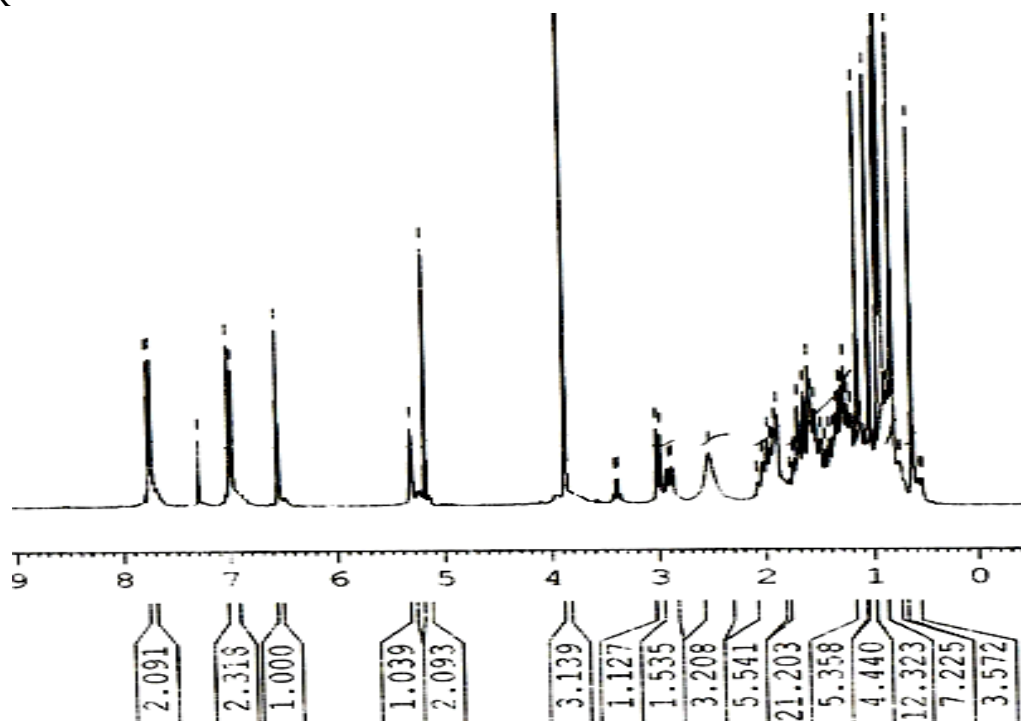

$^{13}\text{C}$  NMR

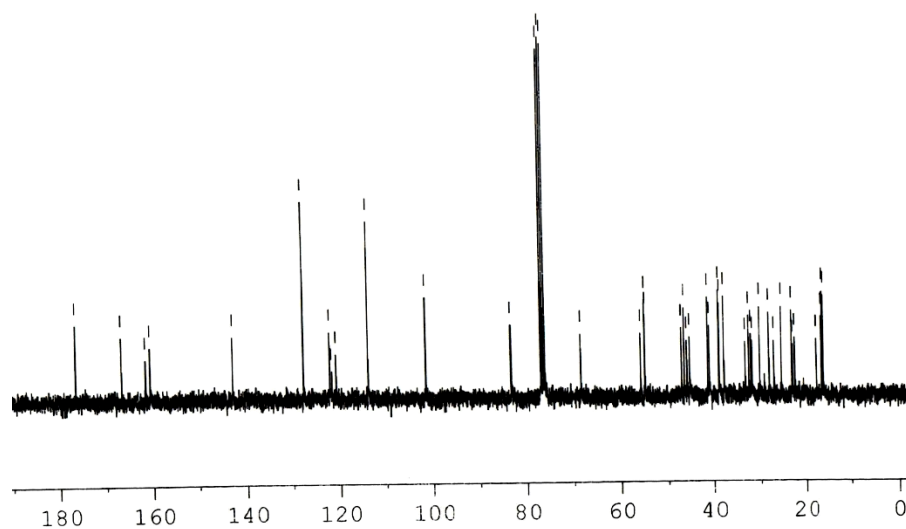

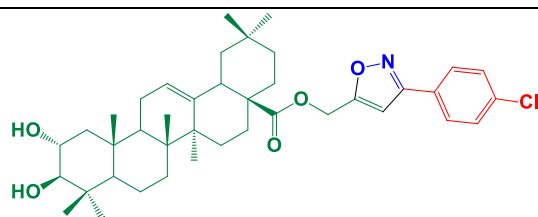

Compound **17**

$^1\text{H}$  NMR

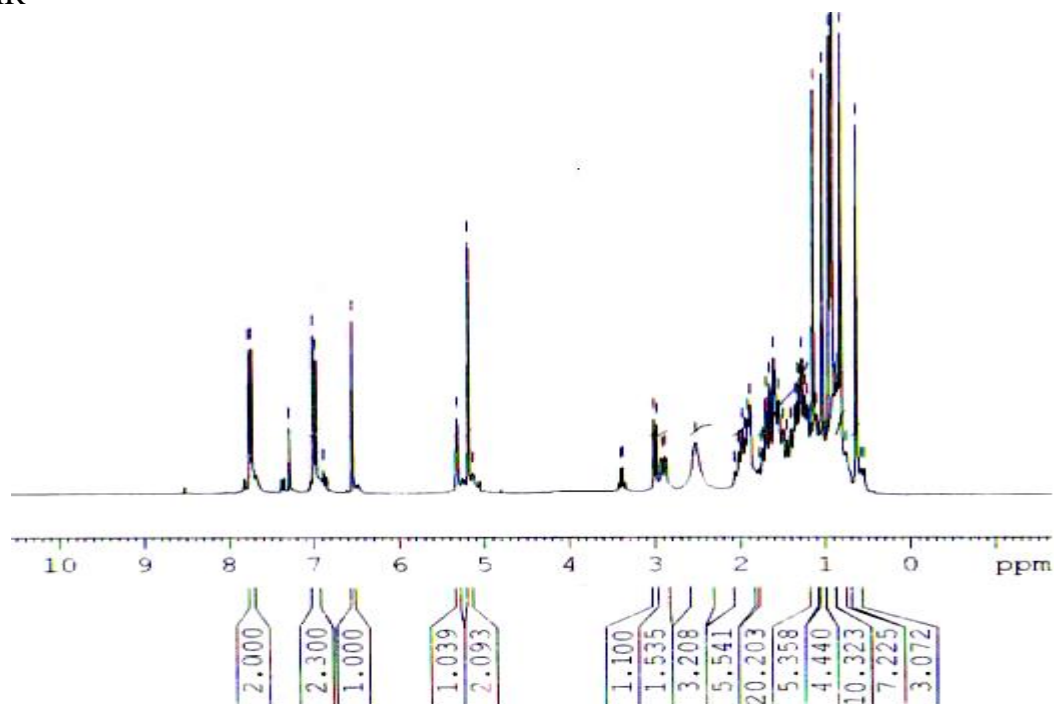

$^{13}\text{C}$  NMR

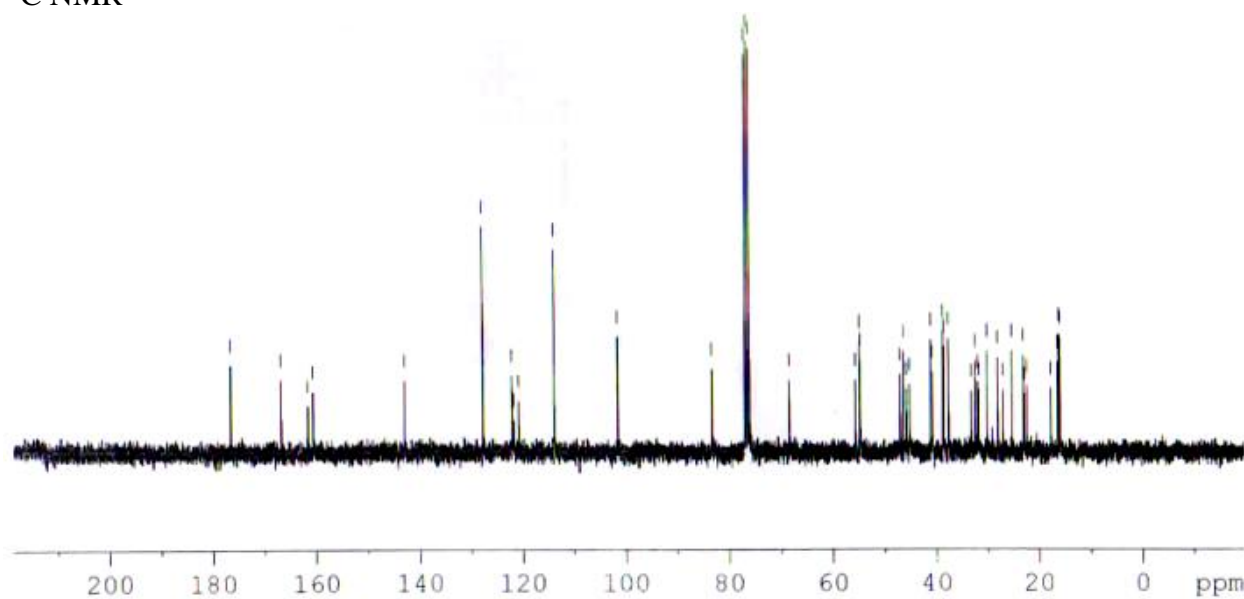

**Supplementary Table (S1).** 2 D and 3 D representations of the redocking process between the native co-crystallized N3 inhibitor (red) and the docked one (green).

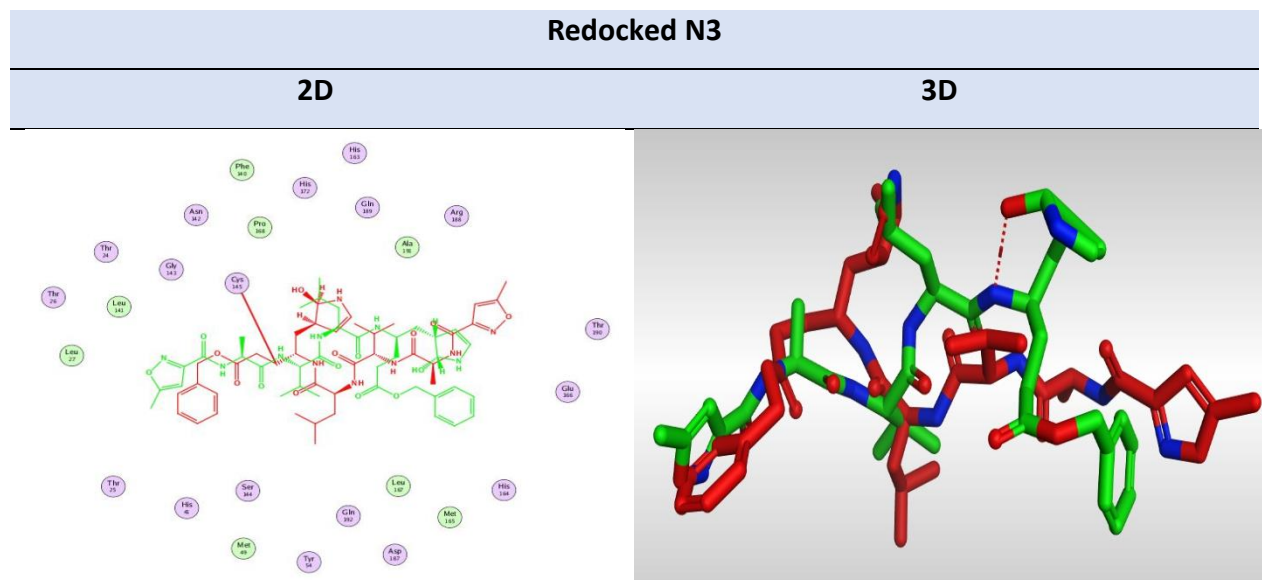

**Supplementary Table (S2).** 2 D pictures representing the binding interactions between the tested compounds (**1-17**) at the N3-binding pocket in comparison to the docked N3 inhibitor (**18**).

| No. | 2 D binding interactions                                                             |
|-----|--------------------------------------------------------------------------------------|
| 1   | 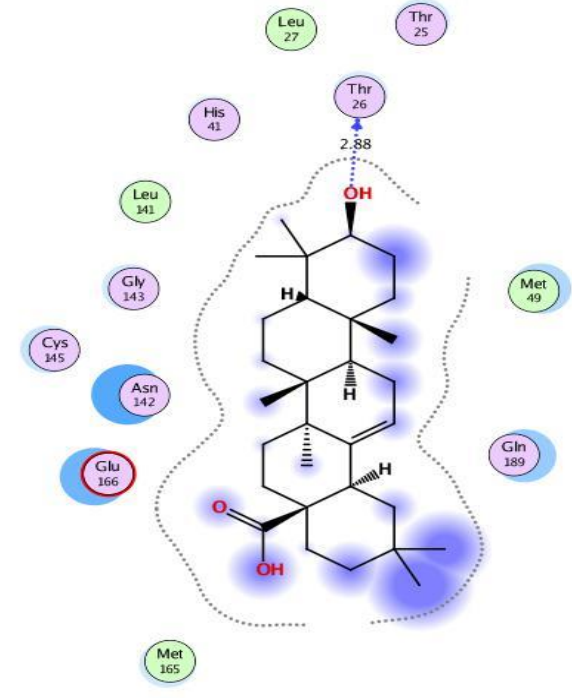  |
| 2   |  |

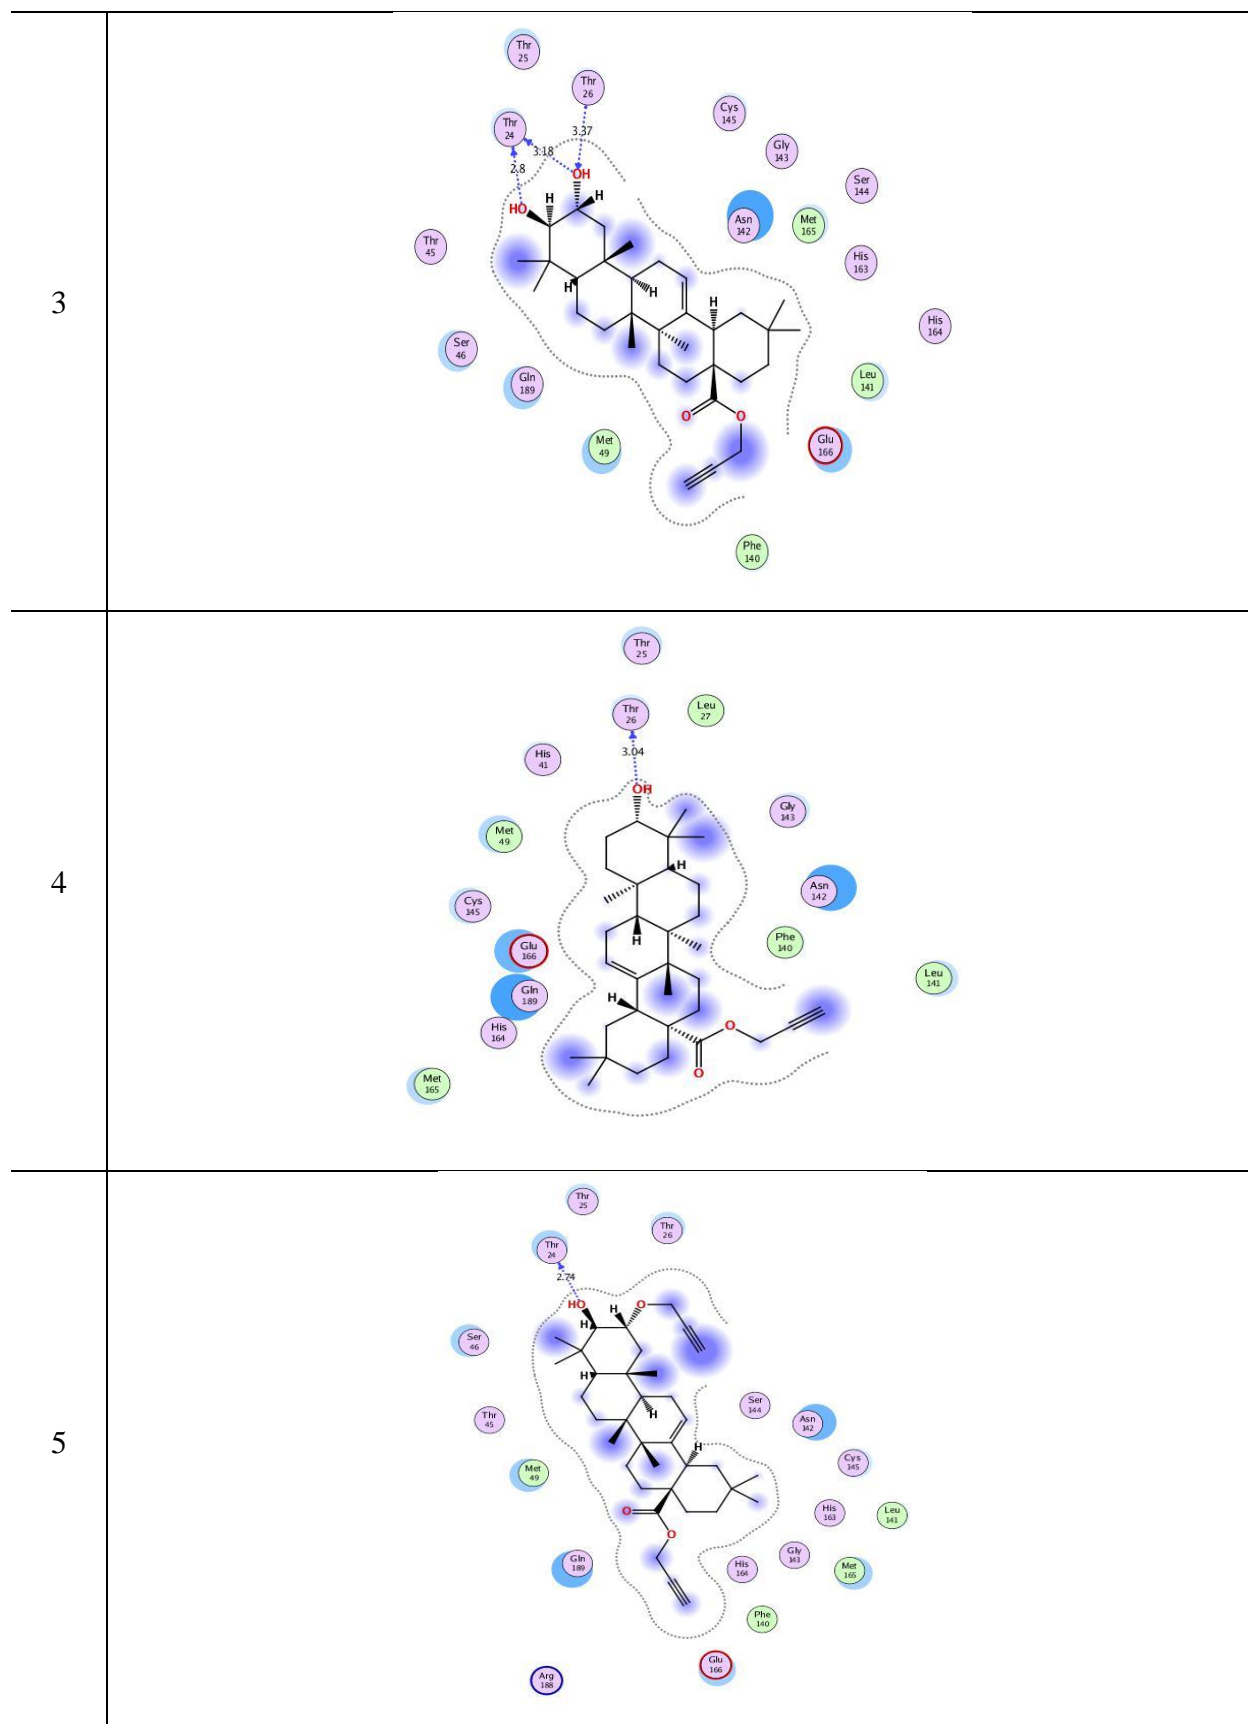

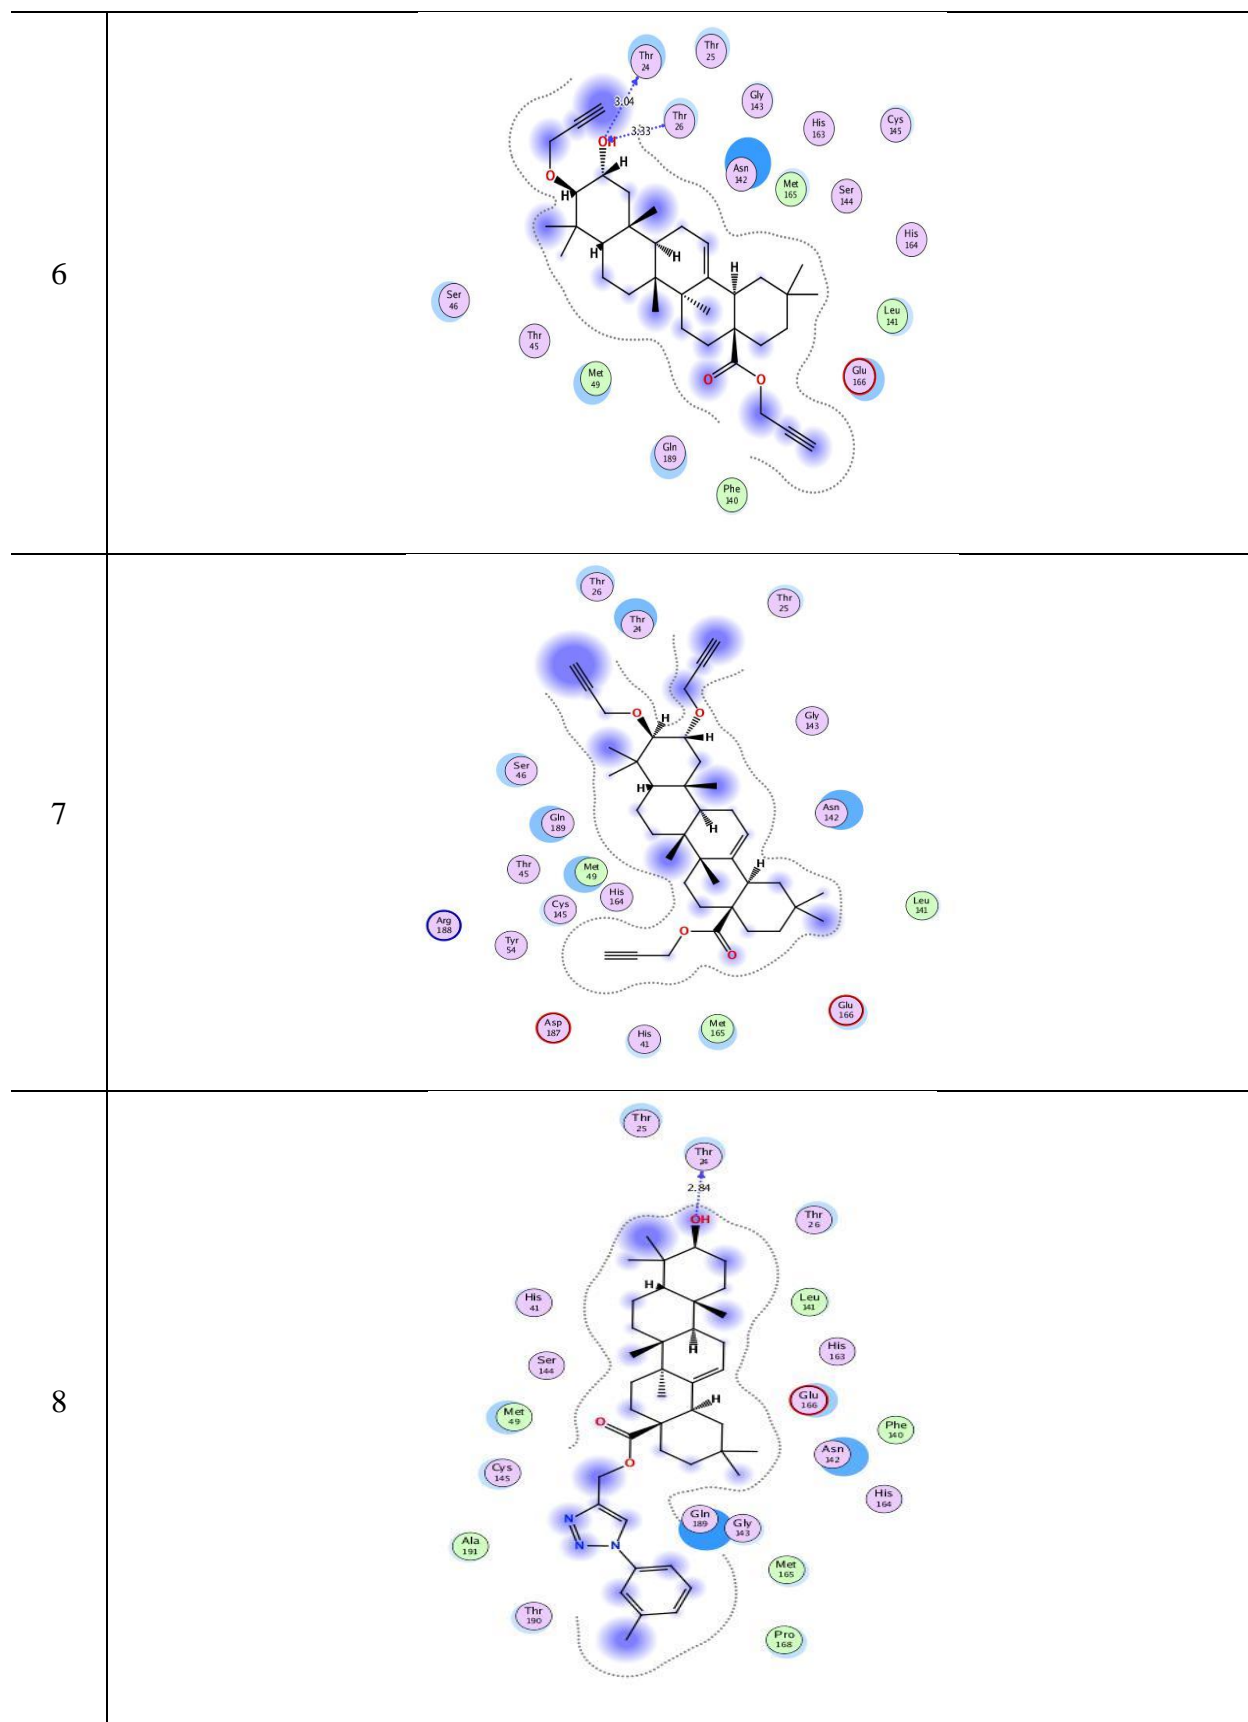

9

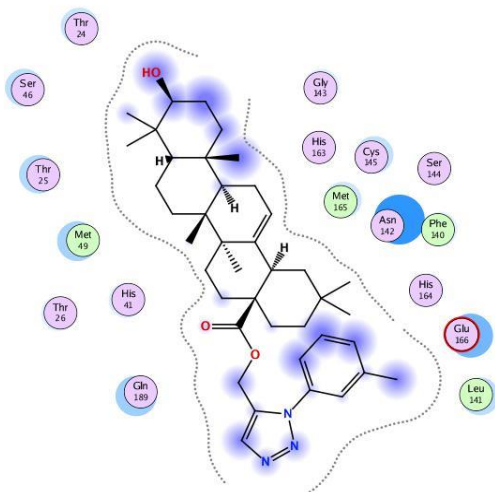

10

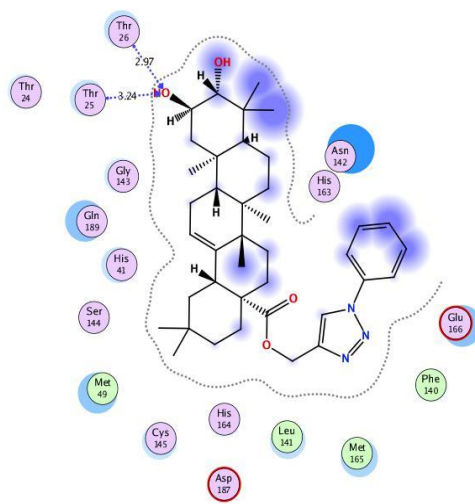

11

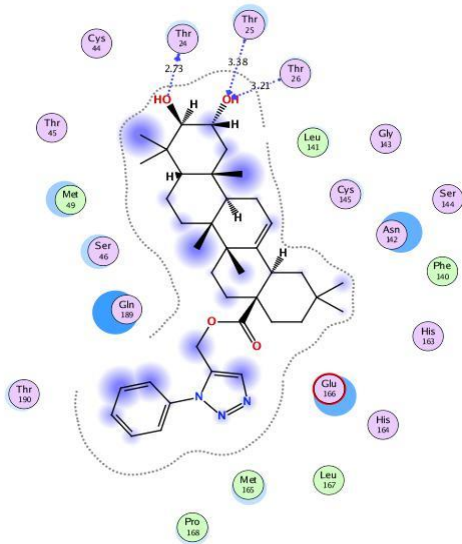

|    |                                                                                      |
|----|--------------------------------------------------------------------------------------|
| 12 | 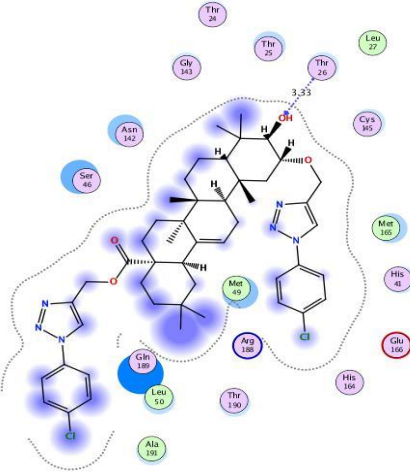   |
| 13 |   |
| 14 |  |



15

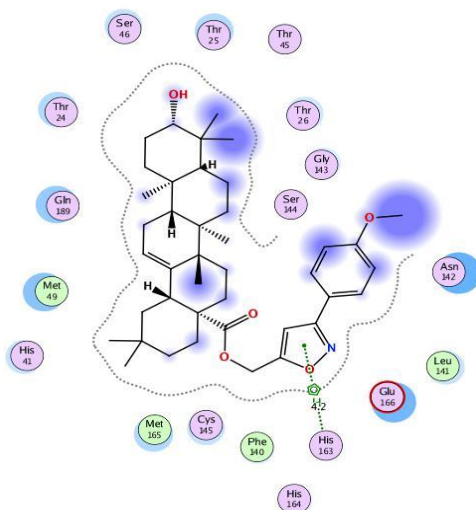

16

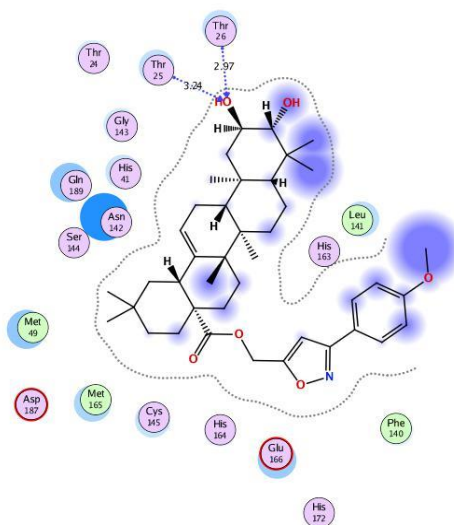

17

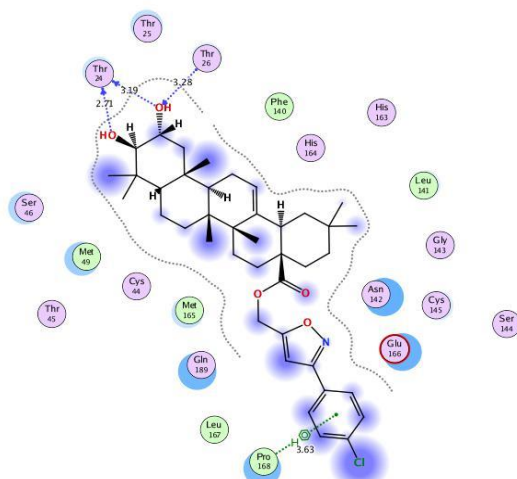

18

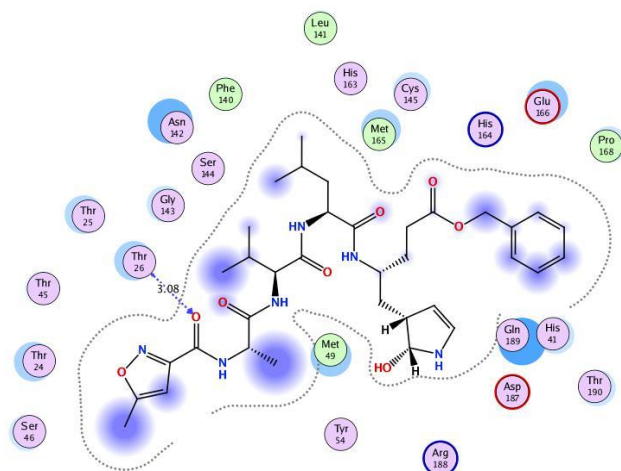

Supplement: s1 [file s1]
